# Supplementary material for: Metal–organic frameworks based on 4-(4-carboxyphenyl)-2,2,4,4-terpyridine: structures, topologies and electrocatalytic behaviors in sodium laurylsulfonate aqueous solution
Source: Royal Society of Chemistry journal article supplement (doi:10.1039/c4ce01506a), 2014-01-01
Supplement: c4ce01506a3.pdf [file c4ce01506a3.pdf]

#####  
1:C52 H32 N6 Ni2 O9  
#####

Structure consists of molecules (ZD1). The composition of molecule is Sc  
Structure consists of molecules (ZE1). The composition of molecule is V  
Topology for ZD1

-----  
Atom ZD1 links by bridge ligands and has  
Common vertex with

|      |        |        |         |           | R(A-A)  | f | Total SA |
|------|--------|--------|---------|-----------|---------|---|----------|
| ZE 1 | 1.0000 | 0.7693 | -0.2500 | ( 1 0 -1) | 8.361A  | 1 | 28.15    |
| ZE 1 | 0.5000 | 1.2693 | -0.2500 | ( 0 0 0)  | 9.249A  | 1 | 25.89    |
| ZE 1 | 1.0000 | 0.7693 | 0.7500  | ( 1 0 0)  | 10.440A | 1 | 45.96    |

Topology for ZE1

-----  
Atom ZE1 links by bridge ligands and has  
Common vertex with

|      |         |        |        |           | R(A-A)  | f | Total SA |
|------|---------|--------|--------|-----------|---------|---|----------|
| ZD 1 | -0.1885 | 0.9571 | 1.0357 | (-1 0 1)  | 8.361A  | 1 | 9.62     |
| ZD 1 | 0.1885  | 0.9571 | 0.4643 | ( 1 0 0)  | 8.361A  | 1 | 9.62     |
| ZD 1 | -0.3115 | 0.4571 | 0.4643 | ( 0 -1 0) | 9.249A  | 1 | 8.85     |
| ZD 1 | 0.3115  | 0.4571 | 1.0357 | (-1 -1 1) | 9.249A  | 1 | 8.85     |
| ZD 1 | -0.1885 | 0.9571 | 0.0357 | (-1 0 0)  | 10.440A | 1 | 15.70    |
| ZD 1 | 0.1885  | 0.9571 | 1.4643 | ( 1 0 1)  | 10.440A | 1 | 15.70    |
| ZE 1 | 0.0000  | 0.2307 | 0.2500 | ( 0 1 1)  | 10.992A | 1 | 15.84    |
| ZE 1 | 0.0000  | 0.2307 | 1.2500 | ( 0 1 2)  | 10.992A | 1 | 15.84    |

-----  
Structural group analysis

-----  
Structural group No 1

-----  
Structure consists of 3D framework with ZE2D2

-----  
Coordination sequences

-----  
ZD1: 1 2 3 4 5 6 7 8 9 10  
Num 3 19 40 89 129 205 265 369 449 581  
Cum 4 23 63 152 281 486 751 1120 1569 2150

-----  
ZE1: 1 2 3 4 5 6 7 8 9 10  
Num 8 20 52 84 144 196 284 356 472 564  
Cum 9 29 81 165 309 505 789 1145 1617 2181

-----  
TD10=2160

-----  
Vertex symbols for selected sublattice

-----  
ZD1 Point (Schlafli) symbol: {4;6^2}  
Extended point symbol: [4(2).6(6).6(6)]

-----  
ZE1 Point (Schlafli) symbol: {4^7;6^18;8^3}  
Extended point symbol: [4.4.4.4.4.4.4(2).6.6.6.6.6.6.6.6.6(3).6(3).6(3).6(3).6(3).6(3).6(4).6(4).6(4).6(4).8(8)]

-----  
Point (Schlafli) symbol for net: {4;6^2}2{4^7;6^18;8^3}  
3,8-c net with stoichiometry (3-c)2(8-c); 2-nodal net

-----  
New topology, please, contact the authors (67371 types in 9 databases)

-----  
Non-equivalent circuits

-----  
Circuit No 1; Type=4a; Centroid: (0.953,0.682,0.196)

-----  
Atom x y z  
-----  
ZD1 0.8115 0.9571 0.0357  
ZE1 1.0000 0.7693 0.7500  
ZE1 1.0000 0.2307 0.2500  
ZE1 1.0000 0.7693 -0.2500

-----  
Circuit No 2; Type=4b; Centroid: (0.000,0.863,0.250)

-----  
Atom x y z  
-----  
ZD1 -0.1885 0.9571 0.0357  
ZE1 0.0000 0.7693 0.7500  
ZD1 0.1885 0.9571 0.4643  
ZE1 0.0000 0.7693 -0.2500

-----  
Circuit No 3; Type=6a; Centroid: (0.656,0.113,0.393)

-----  
Atom x y z  
-----  
ZD1 0.8115 -0.0429 1.0357

c.2  
 ZE1 1.0000 -0.2307 0.7500  
 ZD1 0.8115 -0.0429 0.0357  
 ZE1 0.5000 0.2693 -0.2500  
 ZD1 0.3115 0.4571 0.0357  
 ZE1 0.5000 0.2693 0.7500

Crossed with bonds

| No  | Atom | x      | y      | z      | Atom | x      | y       | z      | Dist. | N Cycles               |
|-----|------|--------|--------|--------|------|--------|---------|--------|-------|------------------------|
| * 4 | ZD1  | 0.8115 | 0.0429 | 0.5357 | ZE1  | 0.5000 | -0.2693 | 0.2500 | 9.249 | 6a/1 6a/1 6b/1 6b/1 8a |

Circuit No 4; Type=6b; Centroid: (0.719,0.113,0.464)

Atom x y z  
 -----  
 ZD1 0.8115 -0.0429 1.0357  
 ZE1 1.0000 -0.2307 0.7500  
 ZD1 0.8115 -0.0429 0.0357  
 ZE1 0.5000 0.2693 -0.2500  
 ZD1 0.6885 0.4571 0.4643  
 ZE1 0.5000 0.2693 0.7500

Crossed with bonds

| No  | Atom | x      | y      | z      | Atom | x      | y       | z      | Dist. | N Cycles               |
|-----|------|--------|--------|--------|------|--------|---------|--------|-------|------------------------|
| * 4 | ZD1  | 0.8115 | 0.0429 | 0.5357 | ZE1  | 0.5000 | -0.2693 | 0.2500 | 9.249 | 6a/1 6a/1 6b/1 6b/1 8a |

Circuit No 5; Type=6c; Centroid: (0.687,0.992,0.429)

Atom x y z  
 -----  
 ZD1 0.8115 0.9571 1.0357  
 ZE1 1.0000 0.7693 0.7500  
 ZD1 0.8115 0.9571 0.0357  
 ZE1 0.5000 1.2693 -0.2500  
 ZE1 0.5000 0.7307 0.2500  
 ZE1 0.5000 1.2693 0.7500

Circuit No 6; Type=6d; Centroid: (0.750,0.750,0.500)

Atom x y z  
 -----  
 ZD1 0.8115 0.9571 1.0357  
 ZE1 1.0000 0.7693 0.7500  
 ZE1 1.0000 0.2307 0.2500  
 ZD1 0.6885 0.5429 -0.0357  
 ZE1 0.5000 0.7307 0.2500  
 ZE1 0.5000 1.2693 0.7500

Circuit No 7; Type=6e; Centroid: (0.750,0.750,0.833)

Atom x y z  
 -----  
 ZD1 0.8115 0.9571 1.0357  
 ZE1 1.0000 0.7693 0.7500  
 ZE1 1.0000 0.2307 1.2500  
 ZD1 0.6885 0.5429 0.9643  
 ZE1 0.5000 0.7307 0.2500  
 ZE1 0.5000 1.2693 0.7500

Circuit No 8; Type=6f; Centroid: (0.750,0.750,0.000)

Atom x y z  
 -----  
 ZD1 0.8115 0.9571 0.0357  
 ZE1 1.0000 0.7693 -0.2500  
 ZE1 1.0000 0.2307 0.2500  
 ZD1 0.6885 0.5429 -0.0357  
 ZE1 0.5000 0.7307 0.2500  
 ZE1 0.5000 1.2693 -0.2500

Circuit No 9; Type=6g; Centroid: (0.750,0.750,0.000)

Atom x y z  
 -----  
 ZD1 0.8115 0.9571 0.0357  
 ZE1 1.0000 0.7693 0.7500  
 ZE1 1.0000 0.2307 0.2500  
 ZD1 0.6885 0.5429 -0.0357  
 ZE1 0.5000 0.7307 -0.7500  
 ZE1 0.5000 1.2693 -0.2500

Circuit No 10; Type=6h; Centroid: (0.750,0.750,0.500)

```

-----
Atom      x      y      z
-----
ZD1      0.8115  0.9571  0.0357
ZE1      1.0000  0.7693  0.7500
ZE1      1.0000  0.2307  1.2500
ZD1      0.6885  0.5429  0.9643
ZE1      0.5000  0.7307  0.2500
ZE1      0.5000  1.2693 -0.2500

```

Circuit No 11; Type=6i; Centroid: (0.937,0.500,0.929)

```

-----
Atom      x      y      z
-----
ZE1      1.0000  0.7693  0.7500
ZE1      1.0000  0.2307  0.2500
ZD1      0.8115  0.0429  0.5357
ZE1      1.0000  0.2307  1.2500
ZE1      1.0000  0.7693  1.7500
ZD1      0.8115  0.9571  1.0357

```

Circuit No 12; Type=6j; Centroid: (0.000,0.500,0.000)

```

-----
Atom      x      y      z
-----
ZE1      0.0000  0.7693 -0.2500
ZE1      0.0000  0.2307 -0.7500
ZD1      0.1885  0.0429 -0.0357
ZE1      0.0000  0.2307  0.2500
ZE1      0.0000  0.7693  0.7500
ZD1     -0.1885  0.9571  0.0357

```

Circuit No 13; Type=6k; Centroid: (0.000,0.500,0.000)

```

-----
Atom      x      y      z
-----
ZE1      0.0000  0.7693 -0.2500
ZE1      0.0000  0.2307 -0.7500
ZD1     -0.1885  0.0429 -0.4643
ZE1      0.0000  0.2307  0.2500
ZE1      0.0000  0.7693  0.7500
ZD1      0.1885  0.9571  0.4643

```

Circuit No 14; Type=8a; Centroid: (0.188,0.051,0.125)

```

-----
Atom      x      y      z
-----
ZE1      0.0000 -0.2307 -0.2500
ZD1      0.1885 -0.0429 -0.5357
ZE1      0.5000  0.2693 -0.2500
ZD1      0.3115  0.4571  0.0357
ZE1      0.5000  0.2693  0.7500
ZD1      0.1885 -0.0429  0.4643
ZE1      0.0000 -0.2307  0.7500
ZD1     -0.1885 -0.0429  0.0357

```

Crossed with bonds

```

-----
No | Atom      x      y      z | Atom      x      y      z | Dist. | N Cycles
-----
* 4 | ZD1      0.1885  0.0429 -0.0357 | ZE1      0.5000 -0.2693  0.2500 | 9.249 | 6a/1 6a/1 6b/1 6b/1 8a
-----

```

Circuit No 15; Type=8b; Centroid: (0.235,0.051,0.179)

```

-----
Atom      x      y      z
-----
ZE1      0.0000 -0.2307 -0.2500
ZD1      0.1885 -0.0429 -0.5357
ZE1      0.5000  0.2693 -0.2500
ZD1      0.6885  0.4571  0.4643
ZE1      0.5000  0.2693  0.7500
ZD1      0.1885 -0.0429  0.4643
ZE1      0.0000 -0.2307  0.7500
ZD1     -0.1885 -0.0429  0.0357

```

Crossed with bonds

```

-----
No | Atom      x      y      z | Atom      x      y      z | Dist. | N Cycles
-----
* 4 | ZD1      0.1885  0.0429 -0.0357 | ZE1      0.5000 -0.2693  0.2500 | 9.249 | 6a/1 6a/1 6b/1 6b/1 8a
-----

```

Circuit No 16; Type=8c; Centroid: (0.211,0.960,0.152)

```

-----
Atom      x      y      z
-----

```

```

c.4
ZE1      0.0000  0.7693 -0.2500
ZD1      0.1885  0.9571 -0.5357
ZE1      0.5000  1.2693 -0.2500
ZE1      0.5000  0.7307  0.2500
ZE1      0.5000  1.2693  0.7500
ZD1      0.1885  0.9571  0.4643
ZE1      0.0000  0.7693  0.7500
ZD1     -0.1885  0.9571  0.0357

```

Circuit No 17; Type=8d; Centroid: (0.024,0.591,0.777)

```

-----
Atom      x      y      z
-----
ZE1      0.0000  0.7693  0.7500
ZD1      0.1885  0.9571  0.4643
ZE1      0.0000  0.7693 -0.2500
ZE1      0.0000  0.2307  0.2500
ZD1      0.1885  0.0429  0.9643
ZE1      0.0000  0.2307  1.2500
ZE1      0.0000  0.7693  1.7500
ZD1     -0.1885  0.9571  1.0357

```

Circuit No 18; Type=8e; Centroid: (0.164,0.778,0.098)

```

-----
Atom      x      y      z
-----
ZE1      0.0000  0.7693 -0.2500
ZD1      0.1885  0.9571 -0.5357
ZE1      0.5000  1.2693 -0.2500
ZE1      0.5000  0.7307  0.2500
ZD1      0.3115  0.5429  0.5357
ZE1      0.0000  0.2307  0.2500
ZE1      0.0000  0.7693  0.7500
ZD1     -0.1885  0.9571  0.0357

```

```

-----
Atom      x      y      z
-----
ZE1      0.0000 -0.2307  0.7500
ZD1      0.1885 -0.0429  0.4643
ZE1      0.5000  0.2693  0.7500
ZD1      0.3115  0.4571  1.0357
ZE1      0.0000  0.7693  0.7500
ZD1     -0.3115  0.4571  0.4643
ZE1     -0.5000  0.2693  0.7500
ZD1     -0.1885 -0.0429  1.0357

```

Crossed with bonds

| No | Atom | x   | y       | z      | Atom   | x   | y      | z      | Dist.  | N Cycles |                        |
|----|------|-----|---------|--------|--------|-----|--------|--------|--------|----------|------------------------|
| *  | 3    | ZD1 | -0.1885 | 0.0429 | 0.5357 | ZE1 | 0.0000 | 0.2307 | 1.2500 | 10.440   | 4b/1 6a/1 6a/1 6b/1 6b |
| *  | 3    | ZD1 | 0.1885  | 0.0429 | 0.9643 | ZE1 | 0.0000 | 0.2307 | 0.2500 | 10.440   | 4b/1 6a/1 6a/1 6b/1 6b |

Circuit No 20; Type=8g; Centroid: (0.188,0.051,0.750)

```

-----
Atom      x      y      z
-----
ZE1      0.0000 -0.2307  0.7500
ZD1      0.1885 -0.0429  1.4643
ZE1      0.5000  0.2693  1.7500
ZD1      0.3115  0.4571  1.0357
ZE1      0.5000  0.2693  0.7500
ZD1      0.1885 -0.0429  0.4643
ZE1      0.0000 -0.2307 -0.2500
ZD1     -0.1885 -0.0429  0.0357

```

Crossed with bonds

| No | Atom | x   | y      | z      | Atom   | x   | y      | z       | Dist.  | N Cycles |                        |
|----|------|-----|--------|--------|--------|-----|--------|---------|--------|----------|------------------------|
| *  | 4    | ZD1 | 0.1885 | 0.0429 | 0.9643 | ZE1 | 0.5000 | -0.2693 | 1.2500 | 9.249    | 6a/1 6a/1 6b/1 6b/1 8a |

Circuit No 21; Type=8h; Centroid: (0.235,0.051,0.804)

```

-----
Atom      x      y      z
-----
ZE1      0.0000 -0.2307  0.7500
ZD1      0.1885 -0.0429  1.4643
ZE1      0.5000  0.2693  1.7500
ZD1      0.6885  0.4571  1.4643
ZE1      0.5000  0.2693  0.7500
ZD1      0.1885 -0.0429  0.4643
ZE1      0.0000 -0.2307 -0.2500
ZD1     -0.1885 -0.0429  0.0357

```

Crossed with bonds

| No  | Atom | x      | y      | z      | Atom | x      | y       | z      | Dist. | N Cycles               |
|-----|------|--------|--------|--------|------|--------|---------|--------|-------|------------------------|
| * 4 | ZD1  | 0.1885 | 0.0429 | 0.9643 | ZE1  | 0.5000 | -0.2693 | 1.2500 | 9.249 | 6a/1 6a/1 6b/1 6b/1 8a |

Circuit No 22; Type=8i; Centroid: (0.211,0.960,0.777)

| Atom | x       | y      | z       |
|------|---------|--------|---------|
| ZE1  | 0.0000  | 0.7693 | 0.7500  |
| ZD1  | 0.1885  | 0.9571 | 1.4643  |
| ZE1  | 0.5000  | 1.2693 | 1.7500  |
| ZE1  | 0.5000  | 0.7307 | 1.2500  |
| ZE1  | 0.5000  | 1.2693 | 0.7500  |
| ZD1  | 0.1885  | 0.9571 | 0.4643  |
| ZE1  | 0.0000  | 0.7693 | -0.2500 |
| ZD1  | -0.1885 | 0.9571 | 0.0357  |

Circuit No 23; Type=8j; Centroid: (0.024,0.591,0.777)

| Atom | x       | y      | z       |
|------|---------|--------|---------|
| ZE1  | 0.0000  | 0.7693 | 0.7500  |
| ZD1  | 0.1885  | 0.9571 | 1.4643  |
| ZE1  | 0.0000  | 0.7693 | 1.7500  |
| ZE1  | 0.0000  | 0.2307 | 1.2500  |
| ZD1  | 0.1885  | 0.0429 | 0.9643  |
| ZE1  | 0.0000  | 0.2307 | 0.2500  |
| ZE1  | 0.0000  | 0.7693 | -0.2500 |
| ZD1  | -0.1885 | 0.9571 | 0.0357  |

Circuit No 24; Type=8k; Centroid: (0.164,0.778,0.723)

| Atom | x       | y      | z       |
|------|---------|--------|---------|
| ZE1  | 0.0000  | 0.7693 | 0.7500  |
| ZD1  | 0.1885  | 0.9571 | 1.4643  |
| ZE1  | 0.5000  | 1.2693 | 1.7500  |
| ZE1  | 0.5000  | 0.7307 | 1.2500  |
| ZD1  | 0.3115  | 0.5429 | 0.5357  |
| ZE1  | 0.0000  | 0.2307 | 0.2500  |
| ZE1  | 0.0000  | 0.7693 | -0.2500 |
| ZD1  | -0.1885 | 0.9571 | 0.0357  |

Circuit No 25; Type=8l; Centroid: (0.000,0.238,0.750)

| Atom | x       | y       | z       |
|------|---------|---------|---------|
| ZE1  | 0.0000  | -0.2307 | 0.7500  |
| ZD1  | 0.1885  | -0.0429 | 1.4643  |
| ZE1  | 0.5000  | 0.2693  | 1.7500  |
| ZD1  | 0.3115  | 0.4571  | 1.0357  |
| ZE1  | 0.0000  | 0.7693  | 0.7500  |
| ZD1  | -0.3115 | 0.4571  | 0.4643  |
| ZE1  | -0.5000 | 0.2693  | -0.2500 |
| ZD1  | -0.1885 | -0.0429 | 0.0357  |

Crossed with bonds

| No  | Atom | x       | y      | z      | Atom | x      | y      | z      | Dist. | N Cycles               |
|-----|------|---------|--------|--------|------|--------|--------|--------|-------|------------------------|
| * 2 | ZD1  | -0.1885 | 0.0429 | 0.5357 | ZE1  | 0.0000 | 0.2307 | 0.2500 | 8.361 | 4b/1 6a/1 6a/1 6b/1 6b |
| * 2 | ZD1  | 0.1885  | 0.0429 | 0.9643 | ZE1  | 0.0000 | 0.2307 | 1.2500 | 8.361 | 4b/1 6a/1 6a/1 6b/1 6b |

Circuit No 26; Type=8m; Centroid: (0.000,0.238,0.125)

| Atom | x       | y       | z       |
|------|---------|---------|---------|
| ZE1  | 0.0000  | 0.7693  | -0.2500 |
| ZD1  | 0.3115  | 0.4571  | 0.0357  |
| ZE1  | 0.5000  | 0.2693  | 0.7500  |
| ZD1  | 0.1885  | -0.0429 | 0.4643  |
| ZE1  | 0.0000  | -0.2307 | 0.7500  |
| ZD1  | -0.1885 | -0.0429 | 0.0357  |
| ZE1  | -0.5000 | 0.2693  | -0.2500 |
| ZD1  | -0.3115 | 0.4571  | -0.5357 |

Crossed with bonds

| No  | Atom | x       | y      | z       | Atom | x      | y      | z      | Dist.  | N Cycles               |
|-----|------|---------|--------|---------|------|--------|--------|--------|--------|------------------------|
| * 2 | ZD1  | 0.1885  | 0.0429 | -0.0357 | ZE1  | 0.0000 | 0.2307 | 0.2500 | 8.361  | 4b/1 6a/1 6a/1 6b/1 6b |
| * 3 | ZD1  | -0.1885 | 0.0429 | -0.4643 | ZE1  | 0.0000 | 0.2307 | 0.2500 | 10.440 | 4b/1 6a/1 6a/1 6b/1 6b |

Circuit No 27; Type=8n; Centroid: (0.000,0.488,0.250)

| Atom | x       | y      | z       |
|------|---------|--------|---------|
| ZE1  | 0.0000  | 0.7693 | -0.2500 |
| ZD1  | 0.3115  | 0.4571 | 0.0357  |
| ZE1  | 0.5000  | 0.2693 | 0.7500  |
| ZD1  | 0.3115  | 0.4571 | 1.0357  |
| ZE1  | 0.0000  | 0.7693 | 0.7500  |
| ZD1  | -0.3115 | 0.4571 | 0.4643  |
| ZE1  | -0.5000 | 0.2693 | -0.2500 |
| ZD1  | -0.3115 | 0.4571 | -0.5357 |

Crossed with bonds

| No | Atom | x   | y       | z      | Atom    | x   | y      | z      | Dist.  | N Cycles |                        |
|----|------|-----|---------|--------|---------|-----|--------|--------|--------|----------|------------------------|
| *  | 4    | ZD1 | -0.3115 | 0.5429 | -0.0357 | ZE1 | 0.0000 | 0.2307 | 0.2500 | 9.249    | 6a/1 6a/1 6b/1 6b/1 8a |
| *  | 4    | ZD1 | 0.3115  | 0.5429 | 0.5357  | ZE1 | 0.0000 | 0.2307 | 0.2500 | 9.249    | 6a/1 6a/1 6b/1 6b/1 8a |

Circuit No 28; Type=8o; Centroid: (0.000,0.238,0.000)

| Atom | x       | y       | z       |
|------|---------|---------|---------|
| ZE1  | 0.0000  | 0.7693  | -0.2500 |
| ZD1  | 0.3115  | 0.4571  | 0.0357  |
| ZE1  | 0.5000  | 0.2693  | 0.7500  |
| ZD1  | 0.1885  | -0.0429 | 0.4643  |
| ZE1  | 0.0000  | -0.2307 | -0.2500 |
| ZD1  | -0.1885 | -0.0429 | 0.0357  |
| ZE1  | -0.5000 | 0.2693  | -0.2500 |
| ZD1  | -0.3115 | 0.4571  | -0.5357 |

Crossed with bonds

| No | Atom | x   | y       | z      | Atom    | x   | y      | z      | Dist.  | N Cycles |                        |
|----|------|-----|---------|--------|---------|-----|--------|--------|--------|----------|------------------------|
| *  | 2    | ZD1 | 0.1885  | 0.0429 | -0.0357 | ZE1 | 0.0000 | 0.2307 | 0.2500 | 8.361    | 4b/1 6a/1 6a/1 6b/1 6b |
| *  | 3    | ZD1 | -0.1885 | 0.0429 | -0.4643 | ZE1 | 0.0000 | 0.2307 | 0.2500 | 10.440   | 4b/1 6a/1 6a/1 6b/1 6b |

Ring links

| Cycle 1 | Cycle 2 | Chain | Cross | Link | Hopf | Mult |
|---------|---------|-------|-------|------|------|------|
| 6a      | 6a      | 1     | 1     | 1    | *    | 2    |
| 6a      | 6b      | 1     | 1     | 1    | *    | 2    |
| 6a      | 8a      | 1     | 1     | 1    | *    | 2    |
| 6a      | 8b      | 1     | 1     | 1    | *    | 2    |
| 6a      | 8f      | 1     | 1     | 1    | *    | 2    |
| 6a      | 8g      | 1     | 1     | 1    | *    | 2    |
| 6a      | 8h      | 1     | 1     | 1    | *    | 2    |
| 6a      | 8l      | 1     | 1     | 1    | *    | 2    |
| 6a      | 8m      | 1     | 1     | 1    | *    | 4    |
| 6a      | 8n      | 1     | 1     | 1    | *    | 2    |
| 6a      | 8o      | 1     | 1     | 1    | *    | 4    |
| 6b      | 6a      | 1     | 1     | 1    | *    | 2    |
| 6b      | 6b      | 1     | 1     | 1    | *    | 2    |
| 6b      | 8a      | 1     | 1     | 1    | *    | 2    |
| 6b      | 8b      | 1     | 1     | 1    | *    | 2    |
| 6b      | 8f      | 1     | 1     | 1    | *    | 2    |
| 6b      | 8g      | 1     | 1     | 1    | *    | 2    |
| 6b      | 8h      | 1     | 1     | 1    | *    | 2    |
| 6b      | 8l      | 1     | 1     | 1    | *    | 2    |
| 6b      | 8m      | 1     | 1     | 1    | *    | 4    |
| 6b      | 8o      | 1     | 1     | 1    | *    | 4    |
| 8a      | 6a      | 1     | 1     | 1    | *    | 2    |
| 8a      | 6b      | 1     | 1     | 1    | *    | 2    |
| 8a      | 8a      | 1     | 1     | 1    | *    | 2    |
| 8a      | 8b      | 1     | 1     | 1    | *    | 2    |
| 8a      | 8f      | 1     | 1     | 1    | *    | 2    |
| 8a      | 8g      | 1     | 1     | 1    | *    | 2    |
| 8a      | 8h      | 1     | 1     | 1    | *    | 2    |
| 8a      | 8l      | 1     | 1     | 1    | *    | 2    |
| 8a      | 8m      | 1     | 1     | 1    | *    | 4    |
| 8a      | 8n      | 1     | 1     | 1    | *    | 2    |
| 8a      | 8o      | 1     | 1     | 1    | *    | 4    |
| 8b      | 6a      | 1     | 1     | 1    | *    | 2    |
| 8b      | 6b      | 1     | 1     | 1    | *    | 2    |
| 8b      | 8a      | 1     | 1     | 1    | *    | 2    |
| 8b      | 8b      | 1     | 1     | 1    | *    | 2    |
| 8b      | 8f      | 1     | 1     | 1    | *    | 2    |
| 8b      | 8g      | 1     | 1     | 1    | *    | 2    |
| 8b      | 8h      | 1     | 1     | 1    | *    | 2    |
| 8b      | 8l      | 1     | 1     | 1    | *    | 2    |

|    |    |   |   |   |   |   |
|----|----|---|---|---|---|---|
| 8b | 8m | 1 | 1 | 1 | * | 4 |
| 8b | 8n | 1 | 1 | 1 | * | 2 |
| 8b | 8o | 1 | 1 | 1 | * | 4 |
| 8f | 4b | 1 | 2 | 0 |   | 1 |
| 8f | 6a | 1 | 1 | 1 | * | 4 |
| 8f | 6b | 1 | 1 | 1 | * | 4 |
| 8f | 8a | 1 | 1 | 1 | * | 4 |
| 8f | 8b | 1 | 1 | 1 | * | 4 |
| 8f | 8g | 1 | 1 | 1 | * | 4 |
| 8f | 8g | 1 | 2 | 0 |   | 2 |
| 8f | 8h | 1 | 1 | 1 | * | 4 |
| 8f | 8h | 1 | 2 | 0 |   | 2 |
| 8f | 8i | 1 | 2 | 0 |   | 2 |
| 8f | 8l | 1 | 1 | 1 | * | 4 |
| 8f | 8m | 1 | 1 | 1 | * | 4 |
| 8f | 8n | 1 | 1 | 1 | * | 2 |
| 8f | 8o | 1 | 1 | 1 | * | 4 |
| 8g | 6a | 1 | 1 | 1 | * | 2 |
| 8g | 6b | 1 | 1 | 1 | * | 2 |
| 8g | 8a | 1 | 1 | 1 | * | 2 |
| 8g | 8b | 1 | 1 | 1 | * | 2 |
| 8g | 8f | 1 | 1 | 1 | * | 2 |
| 8g | 8g | 1 | 1 | 1 | * | 2 |
| 8g | 8h | 1 | 1 | 1 | * | 2 |
| 8g | 8l | 1 | 1 | 1 | * | 2 |
| 8g | 8m | 1 | 1 | 1 | * | 4 |
| 8g | 8n | 1 | 1 | 1 | * | 2 |
| 8g | 8o | 1 | 1 | 1 | * | 4 |
| 8h | 6a | 1 | 1 | 1 | * | 2 |
| 8h | 6b | 1 | 1 | 1 | * | 2 |
| 8h | 8a | 1 | 1 | 1 | * | 2 |
| 8h | 8b | 1 | 1 | 1 | * | 2 |
| 8h | 8f | 1 | 1 | 1 | * | 2 |
| 8h | 8g | 1 | 1 | 1 | * | 2 |
| 8h | 8h | 1 | 1 | 1 | * | 2 |
| 8h | 8l | 1 | 1 | 1 | * | 2 |
| 8h | 8m | 1 | 1 | 1 | * | 4 |
| 8h | 8n | 1 | 1 | 1 | * | 2 |
| 8h | 8o | 1 | 1 | 1 | * | 4 |
| 8l | 4b | 1 | 2 | 0 |   | 1 |
| 8l | 6a | 1 | 1 | 1 | * | 4 |
| 8l | 6b | 1 | 1 | 1 | * | 4 |
| 8l | 8a | 1 | 1 | 1 | * | 4 |
| 8l | 8a | 1 | 2 | 0 |   | 2 |
| 8l | 8b | 1 | 1 | 1 | * | 4 |
| 8l | 8b | 1 | 2 | 0 |   | 2 |
| 8l | 8c | 1 | 2 | 0 |   | 2 |
| 8l | 8f | 1 | 1 | 1 | * | 4 |
| 8l | 8g | 1 | 1 | 1 | * | 4 |
| 8l | 8h | 1 | 1 | 1 | * | 4 |
| 8l | 8m | 1 | 1 | 1 | * | 4 |
| 8l | 8n | 1 | 1 | 1 | * | 2 |
| 8l | 8o | 1 | 1 | 1 | * | 4 |
| 8m | 4b | 1 | 2 | 0 |   | 1 |
| 8m | 6a | 1 | 1 | 1 | * | 4 |
| 8m | 6b | 1 | 1 | 1 | * | 4 |
| 8m | 8a | 1 | 1 | 1 | * | 4 |
| 8m | 8a | 1 | 2 | 0 |   | 1 |
| 8m | 8b | 1 | 1 | 1 | * | 4 |
| 8m | 8b | 1 | 2 | 0 |   | 1 |
| 8m | 8c | 1 | 2 | 0 |   | 1 |
| 8m | 8f | 1 | 1 | 1 | * | 2 |
| 8m | 8g | 1 | 1 | 1 | * | 4 |
| 8m | 8g | 1 | 2 | 0 |   | 1 |
| 8m | 8h | 1 | 1 | 1 | * | 4 |
| 8m | 8h | 1 | 2 | 0 |   | 1 |
| 8m | 8i | 1 | 2 | 0 |   | 1 |
| 8m | 8l | 1 | 1 | 1 | * | 2 |
| 8m | 8m | 1 | 1 | 1 | * | 2 |
| 8m | 8m | 1 | 2 | 0 |   | 1 |
| 8m | 8n | 1 | 1 | 1 | * | 2 |
| 8m | 8o | 1 | 1 | 1 | * | 2 |
| 8m | 8o | 1 | 2 | 0 |   | 1 |
| 8n | 6a | 1 | 1 | 1 | * | 4 |
| 8n | 6b | 1 | 1 | 1 | * | 4 |
| 8n | 8a | 1 | 1 | 1 | * | 4 |
| 8n | 8b | 1 | 1 | 1 | * | 4 |
| 8n | 8f | 1 | 1 | 1 | * | 2 |
| 8n | 8f | 1 | 2 | 0 |   | 1 |
| 8n | 8g | 1 | 1 | 1 | * | 4 |
| 8n | 8h | 1 | 1 | 1 | * | 4 |
| 8n | 8l | 1 | 1 | 1 | * | 2 |
| 8n | 8l | 1 | 2 | 0 |   | 1 |
| 8n | 8m | 1 | 1 | 1 | * | 4 |
| 8n | 8m | 1 | 2 | 0 |   | 2 |

|    |    |   |   |   |   |   |
|----|----|---|---|---|---|---|
| 8n | 8n | 1 | 2 | 0 |   | 2 |
| 8n | 8o | 1 | 1 | 1 | * | 4 |
| 8n | 8o | 1 | 2 | 0 |   | 2 |
| 8o | 4b | 1 | 2 | 0 |   | 1 |
| 8o | 6a | 1 | 1 | 1 | * | 4 |
| 8o | 6b | 1 | 1 | 1 | * | 4 |
| 8o | 8a | 1 | 1 | 1 | * | 4 |
| 8o | 8a | 1 | 2 | 0 |   | 1 |
| 8o | 8b | 1 | 1 | 1 | * | 4 |
| 8o | 8b | 1 | 2 | 0 |   | 1 |
| 8o | 8c | 1 | 2 | 0 |   | 1 |
| 8o | 8f | 1 | 1 | 1 | * | 2 |
| 8o | 8g | 1 | 1 | 1 | * | 4 |
| 8o | 8g | 1 | 2 | 0 |   | 1 |
| 8o | 8h | 1 | 1 | 1 | * | 4 |
| 8o | 8h | 1 | 2 | 0 |   | 1 |
| 8o | 8i | 1 | 2 | 0 |   | 1 |
| 8o | 8l | 1 | 1 | 1 | * | 2 |
| 8o | 8m | 1 | 1 | 1 | * | 2 |
| 8o | 8m | 1 | 2 | 0 |   | 1 |
| 8o | 8n | 1 | 1 | 1 | * | 2 |
| 8o | 8o | 1 | 1 | 1 | * | 2 |
| 8o | 8o | 1 | 2 | 0 |   | 1 |

-----  
Elapsed time: 10.88 sec.
