# Supplementary material for: Metal–organic frameworks based on 4-(4-carboxyphenyl)-2,2,4,4-terpyridine: structures, topologies and electrocatalytic behaviors in sodium laurylsulfonate aqueous solution
Source: Royal Society of Chemistry journal article supplement (doi:10.1039/c4ce01506a), 2014-01-01
Supplement: c4ce01506a4.pdf [file c4ce01506a4.pdf]

#####  
1:C52 H38 Cu2 N6 O11  
#####

Structure consists of molecules (ZD1). The composition of molecule is Sc  
Structure consists of molecules (ZE1). The composition of molecule is Cu  
Topology for ZD1

-----  
Atom ZD1 links by bridge ligands and has  
Common vertex with

|      |        |        |        |          | R(A-A) | f | Total SA |
|------|--------|--------|--------|----------|--------|---|----------|
| ZE 1 | 0.0000 | 0.2550 | 0.7500 | ( 0 0 0) | 8.125A | 1 | 33.02    |
| ZE 2 | 0.5000 | 0.0000 | 0.5000 | ( 0 0 0) | 8.174A | 1 | 34.79    |
| ZE 2 | 0.0000 | 0.5000 | 0.0000 | ( 0 0 0) | 8.806A | 1 | 32.19    |

Topology for ZE1

-----  
Atom ZE1 links by bridge ligands and has  
Common vertex with

|      |         |        |        |           | R(A-A)  | f | Total SA |
|------|---------|--------|--------|-----------|---------|---|----------|
| ZD 1 | 0.1668  | 0.2406 | 0.3723 | ( 0 0 0)  | 8.125A  | 1 | 24.23    |
| ZD 1 | -0.1668 | 0.2406 | 1.1277 | ( 0 0 1)  | 8.125A  | 1 | 24.23    |
| ZE 1 | 0.5000  | 0.2450 | 1.2500 | ( 0 0 0)  | 10.986A | 1 | 25.77    |
| ZE 1 | -0.5000 | 0.2450 | 0.2500 | (-1 0 -1) | 10.986A | 1 | 25.77    |

Topology for ZE2

-----  
Atom ZE2 links by bridge ligands and has  
Common vertex with

|      |         |        |         |           | R(A-A) | f | Total SA |
|------|---------|--------|---------|-----------|--------|---|----------|
| ZD 1 | -0.3332 | 0.2594 | -0.1277 | (-1 0 -1) | 8.174A | 1 | 25.97    |
| ZD 1 | 0.3332  | 0.7406 | 0.1277  | ( 0 0 0)  | 8.174A | 1 | 25.97    |
| ZD 1 | -0.1668 | 0.7594 | -0.3723 | ( 0 1 0)  | 8.806A | 1 | 24.03    |
| ZD 1 | 0.1668  | 0.2406 | 0.3723  | ( 0 0 0)  | 8.806A | 1 | 24.03    |

Structural group analysis

-----  
Structural group No 1

-----  
Structure consists of 3D framework with ZE2D  
There are 3 interpenetrating nets  
FIV: Full interpenetration vectors

-----  
[1/2,1/2,0] (14.82A)  
[1/2,-1/2,0] (14.82A)

-----  
PIC: [3/2,3/2,0][1,0,1][0,1,0] (PICVR=3)

Zt=3; Zn=1

Class Ia Z=3

Coordination sequences

-----  
ZD1: 1 2 3 4 5 6 7 8 9 10  
Num 3 9 16 34 52 83 105 148 187 235  
Cum 4 13 29 63 115 198 303 451 638 873

-----  
ZE1: 1 2 3 4 5 6 7 8 9 10  
Num 4 10 18 34 58 84 108 156 200 228  
Cum 5 15 33 67 125 209 317 473 673 901

-----  
ZE2: 1 2 3 4 5 6 7 8 9 10  
Num 4 8 20 30 56 82 114 146 190 242  
Cum 5 13 33 63 119 201 315 461 651 893

-----  
TD10=885

Vertex symbols for selected sublattice

-----  
ZD1 Point (Schlafli) symbol:{5^2;8}  
Extended point symbol:[5.5.8(3)]

-----  
ZE1 Point (Schlafli) symbol:{5^4;8^2}  
Extended point symbol:[5.5.5.5.8(2).8(2)]

-----  
ZE2 Point (Schlafli) symbol:{5^2;8^2;10^2}  
Extended point symbol:[5.5.8.8.10(2).10(2)]

-----  
Point (Schlafli) symbol for net: {5^2;8^2;10^2}{5^2;8}2{5^4;8^2}  
3,4-c net with stoichiometry (3-c)(4-c); 3-nodal net

New topology, please, contact the authors (67371 types in 9 databases)

-----  
Non-equivalent circuits

-----  
Circuit No 1; Type=5; Centroid: (0.367,0.200,0.749)

| Atom | x      | y      | z      |
|------|--------|--------|--------|
| ZD1  | 0.1668 | 0.2406 | 0.3723 |
| ZE1  | 0.0000 | 0.2550 | 0.7500 |
| ZE1  | 0.5000 | 0.2450 | 1.2500 |
| ZD1  | 0.6668 | 0.2594 | 0.8723 |
| ZE2  | 0.5000 | 0.0000 | 0.5000 |

Crossed with bonds

| No | Atom | x      | y      | z      | Atom | x      | y      | z      | Dist. | N Cycles                |
|----|------|--------|--------|--------|------|--------|--------|--------|-------|-------------------------|
| 4  | ZD1  | 0.3332 | 0.2594 | 0.6277 | ZE2  | 0.5000 | 0.0000 | 1.0000 | 8.806 | 5/inf 8a/inf 8a/inf 8b/ |

Circuit No 2; Type=8a; Centroid: (0.000,0.000,0.000)

| Atom | x       | y       | z       |
|------|---------|---------|---------|
| ZD1  | 0.1668  | 0.2406  | 0.3723  |
| ZE2  | 0.0000  | 0.5000  | 0.0000  |
| ZD1  | -0.3332 | 0.2594  | -0.1277 |
| ZE2  | -0.5000 | 0.0000  | -0.5000 |
| ZD1  | -0.1668 | -0.2406 | -0.3723 |
| ZE2  | 0.0000  | -0.5000 | 0.0000  |
| ZD1  | 0.3332  | -0.2594 | 0.1277  |
| ZE2  | 0.5000  | 0.0000  | 0.5000  |

Crossed with bonds

| No | Atom | x       | y       | z       | Atom | x      | y       | z       | Dist. | N Cycles               |
|----|------|---------|---------|---------|------|--------|---------|---------|-------|------------------------|
| 2  | ZD1  | 0.1668  | -0.2406 | -0.1277 | ZE1  | 0.0000 | -0.2550 | 0.2500  | 8.125 | 5/inf 5/inf 8b/inf 8b/ |
| 2  | ZD1  | -0.1668 | 0.2406  | 0.1277  | ZE1  | 0.0000 | 0.2550  | -0.2500 | 8.125 | 5/inf 5/inf 8b/inf 8b/ |

Circuit No 3; Type=8b; Centroid: (0.125,0.251,0.483)

| Atom | x       | y      | z       |
|------|---------|--------|---------|
| ZD1  | 0.1668  | 0.2406 | 0.3723  |
| ZE2  | 0.0000  | 0.5000 | 0.0000  |
| ZD1  | -0.3332 | 0.2594 | -0.1277 |
| ZE1  | -0.5000 | 0.2450 | 0.2500  |
| ZE1  | 0.0000  | 0.2550 | 0.7500  |
| ZE1  | 0.5000  | 0.2450 | 1.2500  |
| ZD1  | 0.6668  | 0.2594 | 0.8723  |
| ZE2  | 0.5000  | 0.0000 | 0.5000  |

Crossed with bonds

| No | Atom | x       | y      | z      | Atom | x      | y      | z      | Dist. | N Cycles                |
|----|------|---------|--------|--------|------|--------|--------|--------|-------|-------------------------|
| 4  | ZD1  | 0.3332  | 0.2594 | 0.6277 | ZE2  | 0.5000 | 0.0000 | 1.0000 | 8.806 | 5/inf 8a/inf 8a/inf 8b/ |
| 4  | ZD1  | -0.1668 | 0.2406 | 0.1277 | ZE2  | 0.0000 | 0.5000 | 0.5000 | 8.806 | 5/inf 8a/inf 8a/inf 8b/ |

Circuit No 4; Type=8c; Centroid: (0.250,0.250,0.000)

| Atom | x       | y      | z       |
|------|---------|--------|---------|
| ZE1  | 0.0000  | 0.2550 | -0.2500 |
| ZD1  | -0.1668 | 0.2406 | 0.1277  |
| ZE2  | 0.0000  | 0.5000 | 0.5000  |
| ZD1  | 0.3332  | 0.2594 | 0.6277  |
| ZE1  | 0.5000  | 0.2450 | 0.2500  |
| ZD1  | 0.6668  | 0.2594 | -0.1277 |
| ZE2  | 0.5000  | 0.0000 | -0.5000 |
| ZD1  | 0.1668  | 0.2406 | -0.6277 |

Crossed with bonds

| No | Atom | x      | y      | z       | Atom | x      | y      | z      | Dist. | N Cycles                |
|----|------|--------|--------|---------|------|--------|--------|--------|-------|-------------------------|
| 4  | ZD1  | 0.3332 | 0.2594 | -0.3723 | ZE2  | 0.5000 | 0.0000 | 0.0000 | 8.806 | 5/inf 8a/inf 8a/inf 8b/ |
| 4  | ZD1  | 0.1668 | 0.2406 | 0.3723  | ZE2  | 0.0000 | 0.5000 | 0.0000 | 8.806 | 5/inf 8a/inf 8a/inf 8b/ |

Circuit No 5; Type=10a; Centroid: (0.300,0.476,0.525)

| Atom | x       | y      | z       |
|------|---------|--------|---------|
| ZE2  | 0.0000  | 0.5000 | 0.0000  |
| ZD1  | -0.3332 | 0.2594 | -0.1277 |
| ZE1  | -0.5000 | 0.2450 | 0.2500  |
| ZE1  | 0.0000  | 0.2550 | 0.7500  |
| ZE1  | 0.5000  | 0.2450 | 1.2500  |
| ZD1  | 0.6668  | 0.2594 | 0.8723  |
| ZE2  | 1.0000  | 0.5000 | 1.0000  |

0.3

ZD1 0.8332 0.7594 0.6277  
 ZE2 0.5000 1.0000 0.5000  
 ZD1 0.3332 0.7406 0.1277

Crossed with bonds

| No | Atom | x       | y      | z      | Atom | x      | y      | z      | Dist. | N Cycles               |
|----|------|---------|--------|--------|------|--------|--------|--------|-------|------------------------|
| 2  | ZD1  | 0.6668  | 0.7406 | 0.3723 | ZE1  | 0.5000 | 0.7550 | 0.7500 | 8.125 | 5/inf 5/inf 8b/inf 8b/ |
| 3  | ZD1  | 0.3332  | 0.2594 | 0.6277 | ZE2  | 0.0000 | 0.5000 | 0.5000 | 8.174 | 5/inf 8a/inf 8a/inf 8b |
| 4  | ZD1  | -0.1668 | 0.2406 | 0.1277 | ZE2  | 0.0000 | 0.5000 | 0.5000 | 8.806 | 5/inf 8a/inf 8a/inf 8b |

Circuit No 6; Type=10b; Centroid: (0.450,0.526,0.225)

Atom x y z  
 ZE2 0.0000 0.5000 0.0000  
 ZD1 -0.1668 0.7594 -0.3723  
 ZE1 0.0000 0.7450 -0.7500  
 ZE1 0.5000 0.7550 -0.2500  
 ZE1 1.0000 0.7450 0.2500  
 ZD1 0.8332 0.7594 0.6277  
 ZE2 1.0000 0.5000 1.0000  
 ZD1 0.6668 0.2594 0.8723  
 ZE2 0.5000 0.0000 0.5000  
 ZD1 0.1668 0.2406 0.3723

Crossed with bonds

| No | Atom | x      | y      | z       | Atom | x      | y      | z       | Dist. | N Cycles               |
|----|------|--------|--------|---------|------|--------|--------|---------|-------|------------------------|
| 2  | ZD1  | 0.3332 | 0.2594 | 0.6277  | ZE1  | 0.5000 | 0.2450 | 0.2500  | 8.125 | 5/inf 5/inf 8b/inf 8b/ |
| 3  | ZD1  | 0.6668 | 0.7406 | 0.3723  | ZE2  | 1.0000 | 0.5000 | 0.5000  | 8.174 | 5/inf 8a/inf 8a/inf 8b |
| 4  | ZD1  | 0.1668 | 0.7594 | -0.1277 | ZE2  | 0.0000 | 0.5000 | -0.5000 | 8.806 | 5/inf 8a/inf 8a/inf 8b |

Ring links

| Cycle 1 | Cycle 2 | Chain | Cross | Link | Hopf | Mult |
|---------|---------|-------|-------|------|------|------|
| 5       | 5       | inf.  | 1     | 1    | *    | 1    |
| 5       | 8a      | inf.  | 1     | 1    | *    | 2    |
| 5       | 8b      | inf.  | 1     | 1    | *    | 2    |
| 5       | 8c      | inf.  | 1     | 1    | *    | 1    |
| 5       | 10a     | inf.  | 1     | 1    | *    | 2    |
| 5       | 10b     | inf.  | 1     | 1    | *    | 4    |
| 8a      | 5       | inf.  | 1     | 1    | *    | 4    |
| 8a      | 8b      | inf.  | 1     | 1    | *    | 4    |
| 8a      | 8c      | inf.  | 1     | 1    | *    | 4    |
| 8a      | 10a     | inf.  | 1     | 1    | *    | 4    |
| 8a      | 10b     | inf.  | 1     | 1    | *    | 4    |
| 8b      | 5       | inf.  | 1     | 1    | *    | 2    |
| 8b      | 8a      | inf.  | 1     | 1    | *    | 2    |
| 8b      | 8a      | inf.  | 2     | 0    |      | 1    |
| 8b      | 8b      | inf.  | 1     | 1    | *    | 2    |
| 8b      | 8b      | inf.  | 2     | 0    |      | 1    |
| 8b      | 8c      | inf.  | 1     | 1    | *    | 2    |
| 8b      | 10a     | inf.  | 1     | 1    | *    | 2    |
| 8b      | 10a     | inf.  | 2     | 0    |      | 1    |
| 8b      | 10b     | inf.  | 1     | 1    | *    | 6    |
| 8b      | 10b     | inf.  | 2     | 0    |      | 1    |
| 8c      | 5       | inf.  | 1     | 1    | *    | 2    |
| 8c      | 8a      | inf.  | 1     | 1    | *    | 4    |
| 8c      | 8b      | inf.  | 1     | 1    | *    | 4    |
| 8c      | 8c      | inf.  | 1     | 1    | *    | 2    |
| 8c      | 10a     | inf.  | 1     | 1    | *    | 4    |
| 8c      | 10b     | inf.  | 1     | 1    | *    | 8    |
| 10a     | 5       | inf.  | 1     | 1    | *    | 2    |
| 10a     | 5       | inf.  | 2     | 0    |      | 1    |
| 10a     | 8a      | inf.  | 1     | 1    | *    | 2    |
| 10a     | 8a      | inf.  | 2     | 0    |      | 1    |
| 10a     | 8b      | inf.  | 1     | 1    | *    | 2    |
| 10a     | 8b      | inf.  | 2     | 0    |      | 2    |
| 10a     | 8c      | inf.  | 1     | 1    | *    | 2    |
| 10a     | 8c      | inf.  | 2     | 0    |      | 1    |
| 10a     | 10a     | inf.  | 1     | 1    | *    | 6    |
| 10a     | 10a     | inf.  | 2     | 0    |      | 1    |
| 10a     | 10b     | inf.  | 1     | 1    | *    | 6    |
| 10a     | 10b     | inf.  | 2     | 0    |      | 1    |
| 10b     | 5       | inf.  | 1     | 1    | *    | 4    |
| 10b     | 8a      | inf.  | 1     | 1    | *    | 2    |
| 10b     | 8a      | inf.  | 2     | 0    |      | 1    |
| 10b     | 8b      | inf.  | 1     | 1    | *    | 6    |
| 10b     | 8c      | inf.  | 1     | 1    | *    | 4    |
| 10b     | 10a     | inf.  | 1     | 1    | *    | 6    |
| 10b     | 10a     | inf.  | 2     | 0    |      | 1    |

|     |  |     |  |      |  |   |  |   |  |   |  |   |
|-----|--|-----|--|------|--|---|--|---|--|---|--|---|
| 10b |  | 10b |  | inf. |  | 1 |  | 1 |  | * |  | 6 |
| 10b |  | 10b |  | inf. |  | 2 |  | 0 |  |   |  | 1 |

---

Elapsed time: 17.59 sec.
